# Supplementary material for: Mutational Profile of Metastatic Breast Cancers: A Retrospective Analysis
Source: PubMed Central journal article supplement (PMC5189935; doi:10.1371/journal.pmed.1002201), 2016-12-27

### Signature 1 (de novo)

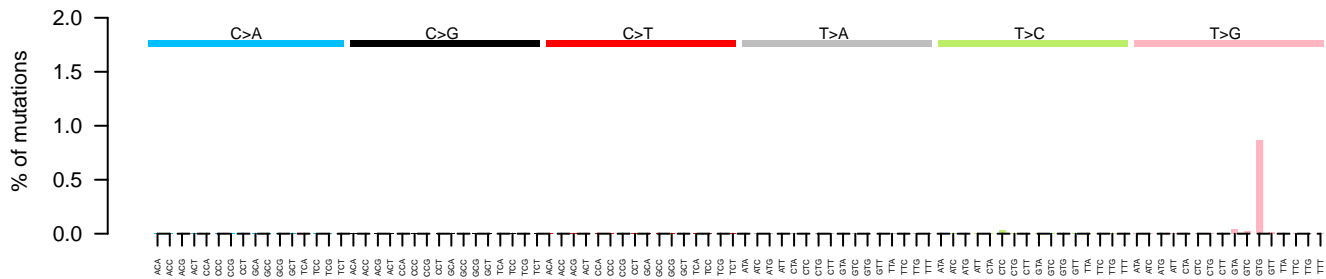

### Signature 2 (de novo)

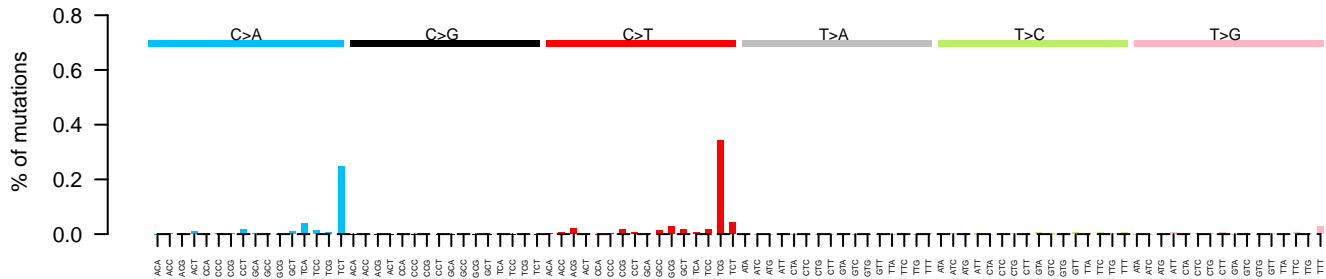

### Signature 3 (de novo)

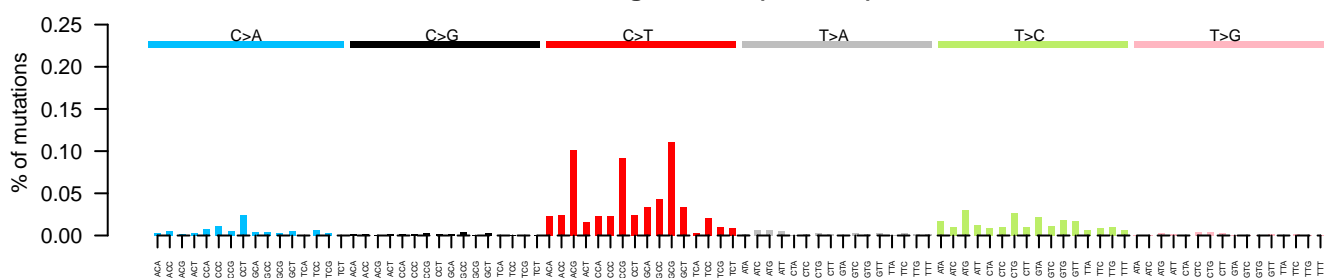

### Signature 4 (de novo)

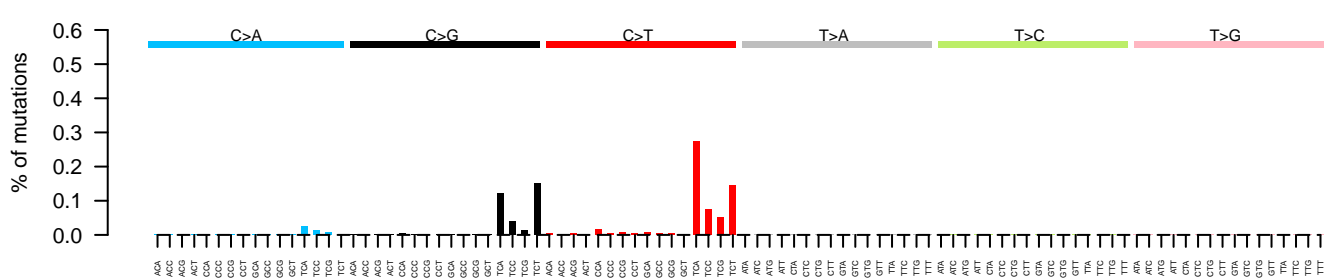

### Signature 5 (de novo)

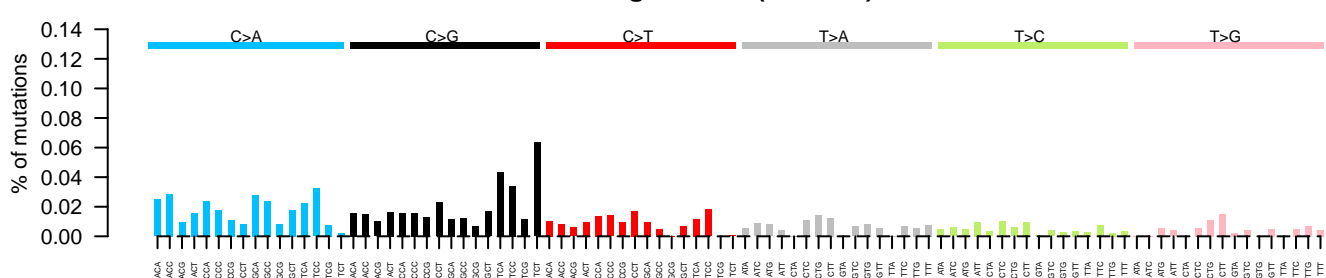

Supplement: pmed.1002201.s006.pdf [file pmed.1002201.s006.pdf]
