# Supplementary material for: Mutational Profile of Metastatic Breast Cancers: A Retrospective Analysis
Source: PubMed Central journal article supplement (PMC5189935; doi:10.1371/journal.pmed.1002201), 2016-12-27

# TN patient

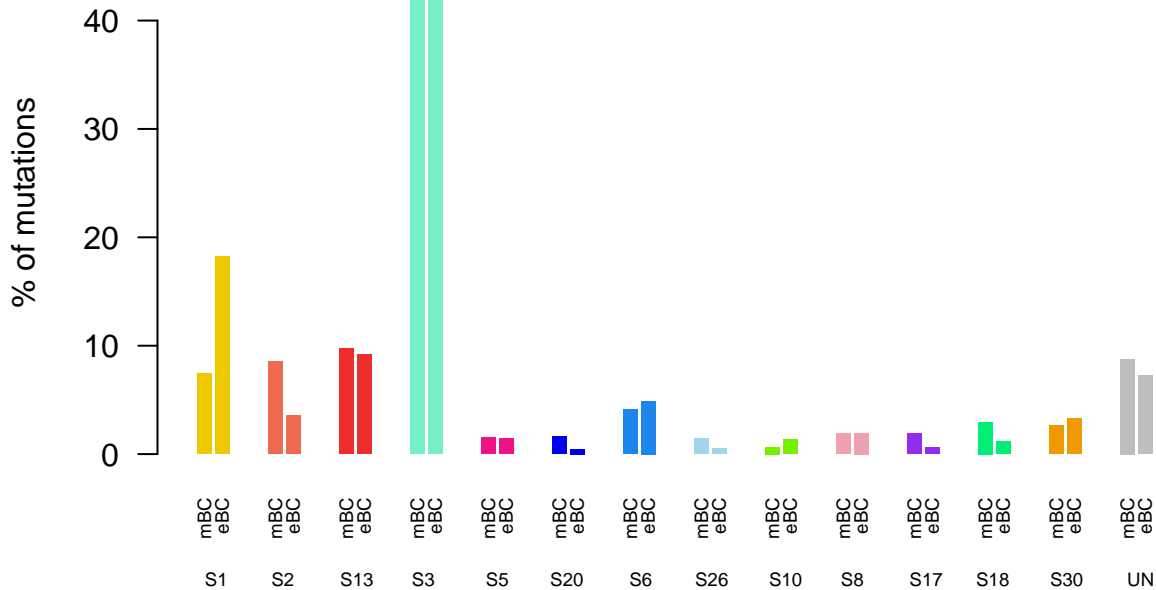

Supplement: pmed.1002201.s007.pdf [file pmed.1002201.s007.pdf]
